# Supplementary material for: School-Based Diabetes Care: A National Survey of U.S. Pediatric Diabetes Providers
Source: Pediatr Diabetes. 2023 Apr 11;2023:4313875. doi: 10.1155/2023/4313875 (PMC10624000; doi:10.1155/2023/4313875)
Supplement: Supplementary Materials — A copy of the survey used for this research study is included in the online supplement. [file 4313875.f1.zip]

Archive with 6 entries (6 files):
- COI Form_Albanese-ONeill.docx
- COI Form_Kazmerski.docx
- COI Form_Libman.docx
- COI Form_March.docx
- COI Form_Miller.docx
- COI Form_Siminerio.docx
